# Supplementary material
Source: publisher figshare collection journal article supplement (https://acs.figshare.com/ndownloader/files/5840007)
Supplement: Supplementary file 1 [file 5840007]

9a
data_organo14_(c63)_2/11/2001
#------------------------------------------------------------------------------
_chemical_name_systematic 
; 
ethyl 1-benzyl-3-(dimethoxymethyl)-4-[(4-methylphenyl)sulfonyl]-5-oxo-2-pyrrolidinecarboxylate 
; 
_chemical_name_common             ? 
_chemical_melting_point           376
#------------------------------------------------------------------------------
_audit_creation_date                  '2003-01-22'
_audit_creation_method                'by teXsan v1.8'
_audit_update_record                   
;
?
;
#------------------------------------------------------------------------------
_publ_requested_journal               ' Angewandte Chemie, International Edition in English '
_publ_requested_category              ' CO '
_publ_contact_author_name             ' Nein-Chen Chang

_publ_contact_author_address
;
Department of Chemistry, National Sun Yat-Sen University, Kaoshsiung 804, Taiwan, Republic of China
;
_publ_contact_letter
;
    ENTER TEXT OF LETTER
;

_publ_requested_coeditor_name          ?
_publ_contact_author_phone            ' (+886)-75253913 '
_publ_contact_author_fax              ' (+886)-75253913 '
_publ_contact_author_email            ' ncchang@mail.nsysu.edu.tw'
loop_
_publ_author_name
_publ_author_footnote
_publ_author_address
' Pei-Pei Sun '
;
  FIRST AUTHORS FOOTNOTES
;
;
Department of Chemistry, National Sun Yat-Sen University, Kaoshsiung 804, Taiwan, Republic of China
;

_publ_section_title
;
A Facile Route to N-Benzyl Ethyl Polysubstituted Pyroglutamates
;

_publ_section_title_footnote          ' ENTER ANY FOOTNOTES TO TITLE '

_publ_section_abstract
;
    ENTER ABSTRACT
;

_publ_section_exptl_refinement
;
    ENTER EXPERIMENTAL SECTION
;

_publ_section_comment
;
    ENTER TEXT
;

_publ_section_references
;
    ENTER OTHER REFERENCES

Molecular Structure Corporation. (1992-1997). teXsan. 
Single Crystal Structure Analysis Software. Version 1.7.
MSC, 3200 Research Forest Drive, The Woodlands, TX 77381, USA.

North, A.C.T., Phillips, D. C. & Mathews, F. S. (1968).
Acta Cryst. A24, 351-359.
;

_publ_section_acknowledgements
;
    ENTER ACKNOWLEDGEMENTS
;

_publ_section_table_legends
;
    ENTER TABLE LEGENDS
;

_publ_section_figure_captions
;
    ENTER FIGURE CAPTIONS
;
#------------------------------------------------------------------------------
_computing_data_collection            'MSC/AFC Diffractometer Control'
_computing_cell_refinement            'MSC/AFC Diffractometer Control'
_computing_data_reduction             'teXsan (MSC, 1992-1997)'
_computing_structure_solution          ?
_computing_structure_refinement       'teXsan (MSC, 1992-1997)'
_computing_publication_material       'teXsan (MSC, 1992-1997)'
#------------------------------------------------------------------------------
_cell_length_a                         18.073(6)
_cell_length_b                         8.335(3)
_cell_length_c                         33.036(4)
_cell_angle_alpha                      90
_cell_angle_beta                       103.84(2)
_cell_angle_gamma                      90
_cell_volume                           4832(2)
_cell_formula_units_Z                  8
_cell_measurement_temperature          298.2
_cell_measurement_reflns_used          25
_cell_measurement_theta_min            9.2
_cell_measurement_theta_max            12.4
#------------------------------------------------------------------------------
_symmetry_cell_setting                 monoclinic
_symmetry_space_group_name_H-M        'C 2/c      '
_symmetry_Int_Tables_number            15
_symmetry_space_group_name_Hall        ?
loop_
_symmetry_equiv_pos_as_xyz
  '   +x,   +y,   +z'
  '1/2+x,1/2+y,   +z'
  '   -x,   +y,1/2-z'
  '1/2-x,1/2+y,1/2-z'
  '   -x,   -y,   -z'
  '1/2-x,1/2-y,   -z'
  '   +x,   -y,1/2+z'
  '1/2+x,1/2-y,1/2+z'
#------------------------------------------------------------------------------

_publ_section_exptl_prep
;
    ENTER EXPERIMENTAL SECTION
;
_exptl_crystal_description            'prism'
_exptl_crystal_colour                 'colorless'
_exptl_crystal_size_max                0.96
_exptl_crystal_size_mid                0.72
_exptl_crystal_size_min                0.42
_exptl_crystal_density_diffrn          1.307
_exptl_crystal_density_meas            'not measured'
_chemical_formula_weight               475.56
_chemical_formula_analytical           ?
_chemical_formula_sum                  'C24 H29 N O7 S '
_chemical_formula_moiety               'C24 H29 N O7 S '
_chemical_formula_structural           ?
_chemical_compound_source              ?
_exptl_crystal_F_000                   2016.00
_exptl_absorpt_coefficient_mu          0.169
_exptl_absorpt_correction_type         
;
\y scans (North,Phillips & Matthews, 1968)
;
_exptl_absorpt_correction_T_max        1.000
_exptl_absorpt_correction_T_min        0.828
_exptl_special_details
;
The scan width was (1.05+0.35tan\q)\% with an \w
scan speed of 0\% per minute 
(up to 5 scans to achieve I/\s(I) > 15).
Stationary background counts were recorded at each end of the
scan, and the scan time:background time ratio was 2:1.
;
#------------------------------------------------------------------------------
_diffrn_special_details
;
 ?
;
_diffrn_ambient_temperature            298.2
_diffrn_radiation_wavelength           0.7107
_diffrn_radiation_type                 'Mo K\a'
_diffrn_radiation_source              'X-ray tube'
_diffrn_radiation_monochromator        graphite
_diffrn_radiation_detector            'scintillation counter'
_diffrn_measurement_device_type       'Rigaku AFC7S'
_diffrn_measurement_method            \w-2\q

_diffrn_standards_number              3
_diffrn_standards_interval_count      150
_diffrn_standards_decay_%             -0.09
loop_
_diffrn_standard_refln_index_h
_diffrn_standard_refln_index_k
_diffrn_standard_refln_index_l
      4       0      2
      3      -1      4
      1      -1      5
_diffrn_reflns_number                  4719
_reflns_number_total                   4561
_reflns_number_gt                      3365
_reflns_threshold_expression            I>3.00\s(I)
_diffrn_reflns_av_R_equivalents        0.03932
_diffrn_reflns_av_sigmaI/netI          0.030
_diffrn_reflns_limit_h_min             0
_diffrn_reflns_limit_h_max             21
_diffrn_reflns_limit_k_min             0
_diffrn_reflns_limit_k_max             9
_diffrn_reflns_limit_l_min             -39
_diffrn_reflns_limit_l_max             38
_diffrn_reflns_theta_min               2.26
_diffrn_reflns_theta_max               24.99
_diffrn_reflns_reduction_process      'Lp corrections applied'
_diffrn_orient_matrix_UB_11            0.02555
_diffrn_orient_matrix_UB_12           -0.10680
_diffrn_orient_matrix_UB_13            0.00581
_diffrn_orient_matrix_UB_21            0.00797
_diffrn_orient_matrix_UB_22           -0.00242
_diffrn_orient_matrix_UB_23           -0.02892
_diffrn_orient_matrix_UB_31            0.05031
_diffrn_orient_matrix_UB_32            0.05462
_diffrn_orient_matrix_UB_33            0.01008
#------------------------------------------------------------------------------
loop_
_atom_type_symbol
_atom_type_oxidation_number
_atom_type_number_in_cell
_atom_type_scat_dispersion_real
_atom_type_scat_dispersion_imag
_atom_type_scat_source
  C  0   192 0.002 0.002 
;International Tables for Crystallography
(1992, Vol. C, Tables 4.2.6.8 and 6.1.1.1)
;
  H  0   232 0.000 0.000 
;International Tables for Crystallography
(1992, Vol. C, Table 6.1.1.2)
;
  N  0     8 0.004 0.003 
;International Tables for Crystallography
(1992, Vol. C, Tables 4.2.6.8 and 6.1.1.1)
;
  O  0    56 0.008 0.006 
;International Tables for Crystallography
(1992, Vol. C, Tables 4.2.6.8 and 6.1.1.1)
;
  S  0     8 0.110 0.124 
;International Tables for Crystallography
(1992, Vol. C, Tables 4.2.6.8 and 6.1.1.1)
;
#------------------------------------------------------------------------------
loop_
_atom_site_label
_atom_site_fract_x
_atom_site_fract_y
_atom_site_fract_z
_atom_site_U_iso_or_equiv
_atom_site_occupancy
_atom_site_refinement_flags
_atom_site_adp_type
_atom_site_calc_flag
_atom_site_calc_attached_atom
S(1) 0.43855(3) 0.43076(7) 0.55626(2) 0.0430(2) 1.000 . Uani d ?
O(1) 0.6094(1) 0.2681(2) 0.58192(5) 0.0580(6) 1.000 . Uani d ?
O(2) 0.44158(9) 0.3546(2) 0.51758(5) 0.0585(5) 1.000 . Uani d ?
O(3) 0.4130(1) 0.3402(2) 0.58727(5) 0.0582(5) 1.000 . Uani d ?
O(4) 0.64502(9) 0.7445(2) 0.61007(5) 0.0536(5) 1.000 . Uani d ?
O(5) 0.5703(1) 0.8923(2) 0.64199(5) 0.0560(5) 1.000 . Uani d ?
O(6) 0.4723(1) 0.6056(2) 0.68927(6) 0.0704(7) 1.000 . Uani d ?
O(7) 0.5032(1) 0.3457(2) 0.69025(6) 0.0663(6) 1.000 . Uani d ?
N(1) 0.6062(1) 0.4035(2) 0.64178(6) 0.0414(5) 1.000 . Uani d ?
C(1) 0.5862(1) 0.3761(3) 0.60033(7) 0.0414(7) 1.000 . Uani d ?
C(2) 0.5316(1) 0.5091(3) 0.58031(6) 0.0366(6) 1.000 . Uani d ?
C(3) 0.5298(1) 0.6280(3) 0.61540(7) 0.0376(6) 1.000 . Uani d ?
C(4) 0.5680(1) 0.5375(3) 0.65589(7) 0.0410(6) 1.000 . Uani d ?
C(5) 0.6614(1) 0.3043(3) 0.67059(8) 0.0517(7) 1.000 . Uani d ?
C(6) 0.7328(1) 0.3941(3) 0.69183(8) 0.0480(7) 1.000 . Uani d ?
C(7) 0.7702(2) 0.4936(4) 0.67000(9) 0.0628(9) 1.000 . Uani d ?
C(8) 0.8384(2) 0.5665(4) 0.6892(1) 0.079(1) 1.000 . Uani d ?
C(9) 0.8689(2) 0.5396(4) 0.7311(1) 0.090(1) 1.000 . Uani d ?
C(10) 0.8323(2) 0.4438(4) 0.7532(1) 0.084(1) 1.000 . Uani d ?
C(11) 0.7642(2) 0.3697(3) 0.73389(8) 0.0625(9) 1.000 . Uani d ?
C(12) 0.3844(1) 0.6079(3) 0.54624(7) 0.0400(6) 1.000 . Uani d ?
C(13) 0.4009(1) 0.7222(3) 0.51960(7) 0.0533(8) 1.000 . Uani d ?
C(14) 0.3636(2) 0.8676(3) 0.51587(8) 0.0612(8) 1.000 . Uani d ?
C(15) 0.3089(1) 0.8996(3) 0.53768(8) 0.0569(8) 1.000 . Uani d ?
C(16) 0.2910(1) 0.7809(4) 0.56254(9) 0.0602(9) 1.000 . Uani d ?
C(17) 0.3286(1) 0.6367(3) 0.56755(8) 0.0512(8) 1.000 . Uani d ?
C(18) 0.2699(2) 1.0608(4) 0.5343(1) 0.085(1) 1.000 . Uani d ?
C(19) 0.5702(1) 0.7826(3) 0.60988(7) 0.0453(7) 1.000 . Uani d ?
C(20) 0.6851(2) 0.8694(4) 0.5955(1) 0.089(1) 1.000 . Uani d ?
C(21) 0.5028(2) 0.9852(4) 0.6361(1) 0.087(1) 1.000 . Uani d ?
C(22) 0.5109(1) 0.4814(3) 0.68023(7) 0.0487(8) 1.000 . Uani d ?
C(23) 0.4126(2) 0.5719(4) 0.71115(9) 0.081(1) 1.000 . Uani d ?
C(24) 0.3406(2) 0.5397(5) 0.6809(1) 0.093(1) 1.000 . Uani d ?
H(1) 0.5516 0.5615 0.5597 0.044 1.000 . Uiso c ?
H(2) 0.4783 0.6509 0.6155 0.045 1.000 . Uiso c ?
H(3) 0.6047 0.6052 0.6731 0.049 1.000 . Uiso c ?
H(4) 0.6379 0.2643 0.6914 0.062 1.000 . Uiso c ?
H(5) 0.6754 0.2171 0.6555 0.062 1.000 . Uiso c ?
H(6) 0.7489 0.5125 0.6412 0.075 1.000 . Uiso c ?
H(7) 0.8639 0.6341 0.6738 0.095 1.000 . Uiso c ?
H(8) 0.9158 0.5885 0.7446 0.108 1.000 . Uiso c ?
H(9) 0.8534 0.4272 0.7821 0.101 1.000 . Uiso c ?
H(10) 0.7391 0.3022 0.7495 0.075 1.000 . Uiso c ?
H(11) 0.4376 0.7010 0.5040 0.064 1.000 . Uiso c ?
H(12) 0.3758 0.9474 0.4980 0.073 1.000 . Uiso c ?
H(13) 0.2516 0.7991 0.5766 0.072 1.000 . Uiso c ?
H(14) 0.3165 0.5572 0.5855 0.061 1.000 . Uiso c ?
H(15) 0.2796 1.1096 0.5610 0.103 1.000 . Uiso c ?
H(16) 0.2891 1.1274 0.5158 0.103 1.000 . Uiso c ?
H(17) 0.2166 1.0469 0.5239 0.103 1.000 . Uiso c ?
H(18) 0.5461 0.8298 0.5839 0.054 1.000 . Uiso c ?
H(19) 0.7356 0.8352 0.5965 0.106 1.000 . Uiso c ?
H(20) 0.6599 0.8956 0.5676 0.106 1.000 . Uiso c ?
H(21) 0.6866 0.9613 0.6127 0.106 1.000 . Uiso c ?
H(22) 0.5069 1.0569 0.6589 0.105 1.000 . Uiso c ?
H(23) 0.4959 1.0448 0.6110 0.105 1.000 . Uiso c ?
H(24) 0.4604 0.9161 0.6345 0.105 1.000 . Uiso c ?
H(25) 0.4266 0.4809 0.7286 0.097 1.000 . Uiso c ?
H(26) 0.4066 0.6621 0.7277 0.097 1.000 . Uiso c ?
H(27) 0.3266 0.6305 0.6633 0.112 1.000 . Uiso c ?
H(28) 0.3464 0.4492 0.6645 0.112 1.000 . Uiso c ?
H(29) 0.3019 0.5186 0.6952 0.112 1.000 . Uiso c ?

loop_
_atom_site_aniso_label
_atom_site_aniso_U_11
_atom_site_aniso_U_22
_atom_site_aniso_U_33
_atom_site_aniso_U_12
_atom_site_aniso_U_13
_atom_site_aniso_U_23
 S(1)   0.0400(3)   0.0422(3)   0.0440(3)   -0.0022(3)  0.0046(3)   -0.0065(3) 
 O(1)   0.064(1)    0.057(1)    0.053(1)    0.0197(9)   0.0140(9)   -0.0090(9) 
 O(2)   0.058(1)    0.062(1)    0.050(1)    0.0022(9)   0.0030(8)   -0.0237(9) 
 O(3)   0.057(1)    0.052(1)    0.065(1)    -0.0099(9)  0.0156(9)   0.0068(9)  
 O(4)   0.047(1)    0.042(1)    0.074(1)    -0.0040(8)  0.0175(9)   0.0035(9)  
 O(5)   0.061(1)    0.042(1)    0.060(1)    0.0016(8)   0.0046(9)   -0.0141(9) 
 O(6)   0.086(1)    0.062(1)    0.077(1)    0.017(1)    0.045(1)    0.002(1)   
 O(7)   0.087(1)    0.053(1)    0.068(1)    0.004(1)    0.037(1)    0.010(1)   
 N(1)   0.042(1)    0.039(1)    0.041(1)    0.0084(9)   0.0058(9)   0.0023(9)  
 C(1)   0.040(1)    0.040(1)    0.044(1)    0.002(1)    0.011(1)    -0.001(1)  
 C(2)   0.037(1)    0.037(1)    0.035(1)    0.000(1)    0.0050(9)   -0.002(1)  
 C(3)   0.037(1)    0.036(1)    0.038(1)    0.003(1)    0.0041(9)   -0.001(1)  
 C(4)   0.045(1)    0.037(1)    0.038(1)    0.001(1)    0.004(1)    -0.003(1)  
 C(5)   0.051(1)    0.047(1)    0.053(2)    0.010(1)    0.004(1)    0.009(1)   
 C(6)   0.045(1)    0.046(1)    0.051(1)    0.013(1)    0.006(1)    -0.003(1)  
 C(7)   0.055(2)    0.066(2)    0.066(2)    0.005(1)    0.012(1)    0.003(2)   
 C(8)   0.056(2)    0.069(2)    0.114(3)    0.000(2)    0.025(2)    -0.006(2)  
 C(9)   0.053(2)    0.080(3)    0.121(3)    0.006(2)    -0.006(2)   -0.031(2)  
 C(10)  0.082(2)    0.088(3)    0.066(2)    0.018(2)    -0.015(2)   -0.022(2)  
 C(11)  0.066(2)    0.066(2)    0.050(2)    0.014(1)    0.003(1)    -0.006(1)  
 C(12)  0.035(1)    0.048(1)    0.034(1)    0.000(1)    0.001(1)    -0.005(1)  
 C(13)  0.050(1)    0.069(2)    0.040(1)    0.010(1)    0.009(1)    0.003(1)   
 C(14)  0.058(2)    0.063(2)    0.056(2)    0.011(1)    0.002(1)    0.014(1)   
 C(15)  0.044(1)    0.057(2)    0.059(2)    0.008(1)    -0.009(1)   -0.012(1)  
 C(16)  0.041(1)    0.072(2)    0.067(2)    0.006(1)    0.013(1)    -0.016(2)  
 C(17)  0.040(1)    0.061(2)    0.055(2)    -0.003(1)   0.015(1)    -0.002(1)  
 C(18)  0.072(2)    0.064(2)    0.105(3)    0.017(2)    -0.008(2)   -0.015(2)  
 C(19)  0.050(1)    0.036(1)    0.046(1)    0.002(1)    0.002(1)    -0.001(1)  
 C(20)  0.082(2)    0.061(2)    0.134(3)    -0.016(2)   0.047(2)    0.009(2)   
 C(21)  0.079(2)    0.056(2)    0.125(3)    0.012(2)    0.020(2)    -0.030(2)  
 C(22)  0.060(2)    0.048(2)    0.039(1)    0.006(1)    0.013(1)    -0.004(1)  
 C(23)  0.090(2)    0.096(3)    0.069(2)    0.025(2)    0.044(2)    0.005(2)   
 C(24)  0.091(3)    0.107(3)    0.091(3)    0.028(2)    0.041(2)    0.019(2)   
#------------------------------------------------------------------------------
_refine_special_details
;
 ?
;
_refine_ls_structure_factor_coef       F
_refine_ls_matrix_type                 full
_refine_ls_weighting_scheme            sigma
_refine_ls_weighting_details           'w = 1/[\s^2^(Fo) + 0.00002|Fo|^2^]'
_refine_ls_hydrogen_treatment          noref
_refine_ls_extinction_method           none
_refine_ls_extinction_coef             ?
_refine_ls_abs_structure_details       ?
_refine_ls_abs_structure_Flack         ?
_refine_ls_number_reflns               3365
_refine_ls_number_parameters           298
_refine_ls_number_restraints           0
_refine_ls_number_constraints          0
_refine_ls_R_factor_all                0.0566
_refine_ls_R_factor_gt                 0.0423
_refine_ls_wR_factor_all               0.0484
_refine_ls_wR_factor_ref               0.0476
_refine_ls_goodness_of_fit_all         3.222
_refine_ls_goodness_of_fit_ref         3.588
_refine_ls_shift/su_max                0.0010
_refine_ls_shift/su_mean               0.0020
_refine_diff_density_min               -0.33
_refine_diff_density_max               0.28
#------------------------------------------------------------------------------
_geom_special_details
;
 ?
;
loop_
_geom_bond_atom_site_label_1
_geom_bond_atom_site_label_2
_geom_bond_distance
_geom_bond_site_symmetry_1
_geom_bond_site_symmetry_2
_geom_bond_publ_flag
 S(1) O(2) 1.440(2) . . yes
 S(1) O(3) 1.435(2) . . yes
 S(1) C(2) 1.801(2) . . yes
 S(1) C(12) 1.758(2) . . yes
 O(1) C(1) 1.215(2) . . yes
 O(4) C(19) 1.388(3) . . yes
 O(4) C(20) 1.416(3) . . yes
 O(5) C(19) 1.400(3) . . yes
 O(5) C(21) 1.419(3) . . yes
 O(6) C(22) 1.322(3) . . yes
 O(6) C(23) 1.462(3) . . yes
 O(7) C(22) 1.196(3) . . yes
 N(1) C(1) 1.349(3) . . yes
 N(1) C(4) 1.449(3) . . yes
 N(1) C(5) 1.459(3) . . yes
 C(1) C(2) 1.526(3) . . yes
 C(2) C(3) 1.531(3) . . yes
 C(2) H(1) 0.95 . . no
 C(3) C(4) 1.547(3) . . yes
 C(3) C(19) 1.514(3) . . yes
 C(3) H(2) 0.95 . . no
 C(4) C(22) 1.525(3) . . yes
 C(4) H(3) 0.95 . . no
 C(5) C(6) 1.511(3) . . yes
 C(5) H(4) 0.95 . . no
 C(5) H(5) 0.95 . . no
 C(6) C(7) 1.379(4) . . yes
 C(6) C(11) 1.384(3) . . yes
 C(7) C(8) 1.384(4) . . yes
 C(7) H(6) 0.95 . . no
 C(8) C(9) 1.381(5) . . yes
 C(8) H(7) 0.95 . . no
 C(9) C(10) 1.356(5) . . yes
 C(9) H(8) 0.95 . . no
 C(10) C(11) 1.388(4) . . yes
 C(10) H(9) 0.95 . . no
 C(11) H(10) 0.95 . . no
 C(12) C(13) 1.377(3) . . yes
 C(12) C(17) 1.382(3) . . yes
 C(13) C(14) 1.378(4) . . yes
 C(13) H(11) 0.95 . . no
 C(14) C(15) 1.382(4) . . yes
 C(14) H(12) 0.95 . . no
 C(15) C(16) 1.373(4) . . yes
 C(15) C(18) 1.508(4) . . yes
 C(16) C(17) 1.372(4) . . yes
 C(16) H(13) 0.95 . . no
 C(17) H(14) 0.95 . . no
 C(18) H(15) 0.95 . . no
 C(18) H(16) 0.95 . . no
 C(18) H(17) 0.95 . . no
 C(19) H(18) 0.95 . . no
 C(20) H(19) 0.95 . . no
 C(20) H(20) 0.95 . . no
 C(20) H(21) 0.95 . . no
 C(21) H(22) 0.95 . . no
 C(21) H(23) 0.95 . . no
 C(21) H(24) 0.95 . . no
 C(23) C(24) 1.465(4) . . yes
 C(23) H(25) 0.95 . . no
 C(23) H(26) 0.95 . . no
 C(24) H(27) 0.95 . . no
 C(24) H(28) 0.95 . . no
 C(24) H(29) 0.95 . . no
#------------------------------------------------------------------------------
loop_
_geom_angle_atom_site_label_1
_geom_angle_atom_site_label_2
_geom_angle_atom_site_label_3
_geom_angle
_geom_angle_site_symmetry_1
_geom_angle_site_symmetry_2
_geom_angle_site_symmetry_3
_geom_angle_publ_flag
 O(2) S(1)  O(3) 119.3(1) . . . yes
 O(2) S(1)  C(2) 108.8(1) . . . yes
 O(2) S(1)  C(12) 109.9(1) . . . yes
 O(3) S(1)  C(2) 107.6(1) . . . yes
 O(3) S(1)  C(12) 108.4(1) . . . yes
 C(2) S(1)  C(12) 101.4(1) . . . yes
 C(19) O(4)  C(20) 114.0(2) . . . yes
 C(19) O(5)  C(21) 114.0(2) . . . yes
 C(22) O(6)  C(23) 117.0(2) . . . yes
 C(1) N(1)  C(4) 115.1(2) . . . yes
 C(1) N(1)  C(5) 122.8(2) . . . yes
 C(4) N(1)  C(5) 122.1(2) . . . yes
 O(1) C(1)  N(1) 126.3(2) . . . yes
 O(1) C(1)  C(2) 125.9(2) . . . yes
 N(1) C(1)  C(2) 107.8(2) . . . yes
 S(1) C(2)  C(1) 111.5(2) . . . yes
 S(1) C(2)  C(3) 112.4(1) . . . yes
 S(1) C(2)  H(1) 109.0 . . . no
 C(1) C(2)  C(3) 105.7(2) . . . yes
 C(1) C(2)  H(1) 109.0 . . . no
 C(3) C(2)  H(1) 109.0 . . . no
 C(2) C(3)  C(4) 104.7(2) . . . yes
 C(2) C(3)  C(19) 111.2(2) . . . yes
 C(2) C(3)  H(2) 109.3 . . . no
 C(4) C(3)  C(19) 113.0(2) . . . yes
 C(4) C(3)  H(2) 109.3 . . . no
 C(19) C(3)  H(2) 109.3 . . . no
 N(1) C(4)  C(3) 104.3(2) . . . yes
 N(1) C(4)  C(22) 111.6(2) . . . yes
 N(1) C(4)  H(3) 109.4 . . . no
 C(3) C(4)  C(22) 112.8(2) . . . yes
 C(3) C(4)  H(3) 109.4 . . . no
 C(22) C(4)  H(3) 109.4 . . . no
 N(1) C(5)  C(6) 113.4(2) . . . yes
 N(1) C(5)  H(4) 108.5 . . . no
 N(1) C(5)  H(5) 108.5 . . . no
 C(6) C(5)  H(4) 108.5 . . . no
 C(6) C(5)  H(5) 108.5 . . . no
 H(4) C(5)  H(5) 109.5 . . . no
 C(5) C(6)  C(7) 121.8(2) . . . yes
 C(5) C(6)  C(11) 119.5(2) . . . yes
 C(7) C(6)  C(11) 118.6(2) . . . yes
 C(6) C(7)  C(8) 121.3(3) . . . yes
 C(6) C(7)  H(6) 119.4 . . . no
 C(8) C(7)  H(6) 119.4 . . . no
 C(7) C(8)  C(9) 119.1(3) . . . yes
 C(7) C(8)  H(7) 120.5 . . . no
 C(9) C(8)  H(7) 120.5 . . . no
 C(8) C(9)  C(10) 120.4(3) . . . yes
 C(8) C(9)  H(8) 119.8 . . . no
 C(10) C(9)  H(8) 119.8 . . . no
 C(9) C(10)  C(11) 120.5(3) . . . yes
 C(9) C(10)  H(9) 119.8 . . . no
 C(11) C(10)  H(9) 119.8 . . . no
 C(6) C(11)  C(10) 120.1(3) . . . yes
 C(6) C(11)  H(10) 119.9 . . . no
 C(10) C(11)  H(10) 119.9 . . . no
 S(1) C(12)  C(13) 120.4(2) . . . yes
 S(1) C(12)  C(17) 119.4(2) . . . yes
 C(13) C(12)  C(17) 120.1(2) . . . yes
 C(12) C(13)  C(14) 119.3(2) . . . yes
 C(12) C(13)  H(11) 120.3 . . . no
 C(14) C(13)  H(11) 120.3 . . . no
 C(13) C(14)  C(15) 121.2(3) . . . yes
 C(13) C(14)  H(12) 119.4 . . . no
 C(15) C(14)  H(12) 119.4 . . . no
 C(14) C(15)  C(16) 118.3(2) . . . yes
 C(14) C(15)  C(18) 120.8(3) . . . yes
 C(16) C(15)  C(18) 120.9(3) . . . yes
 C(15) C(16)  C(17) 121.5(2) . . . yes
 C(15) C(16)  H(13) 119.3 . . . no
 C(17) C(16)  H(13) 119.3 . . . no
 C(12) C(17)  C(16) 119.5(2) . . . yes
 C(12) C(17)  H(14) 120.3 . . . no
 C(16) C(17)  H(14) 120.3 . . . no
 C(15) C(18)  H(15) 109.5 . . . no
 C(15) C(18)  H(16) 109.5 . . . no
 C(15) C(18)  H(17) 109.5 . . . no
 H(15) C(18)  H(16) 109.5 . . . no
 H(15) C(18)  H(17) 109.5 . . . no
 H(16) C(18)  H(17) 109.5 . . . no
 O(4) C(19)  O(5) 108.7(2) . . . yes
 O(4) C(19)  C(3) 107.6(2) . . . yes
 O(4) C(19)  H(18) 109.4 . . . no
 O(5) C(19)  C(3) 112.3(2) . . . yes
 O(5) C(19)  H(18) 109.4 . . . no
 C(3) C(19)  H(18) 109.4 . . . no
 O(4) C(20)  H(19) 109.5 . . . no
 O(4) C(20)  H(20) 109.5 . . . no
 O(4) C(20)  H(21) 109.5 . . . no
 H(19) C(20)  H(20) 109.5 . . . no
 H(19) C(20)  H(21) 109.5 . . . no
 H(20) C(20)  H(21) 109.5 . . . no
 O(5) C(21)  H(22) 109.5 . . . no
 O(5) C(21)  H(23) 109.5 . . . no
 O(5) C(21)  H(24) 109.5 . . . no
 H(22) C(21)  H(23) 109.5 . . . no
 H(22) C(21)  H(24) 109.5 . . . no
 H(23) C(21)  H(24) 109.5 . . . no
 O(6) C(22)  O(7) 125.1(2) . . . yes
 O(6) C(22)  C(4) 109.8(2) . . . yes
 O(7) C(22)  C(4) 125.1(2) . . . yes
 O(6) C(23)  C(24) 109.8(2) . . . yes
 O(6) C(23)  H(25) 109.4 . . . no
 O(6) C(23)  H(26) 109.4 . . . no
 C(24) C(23)  H(25) 109.4 . . . no
 C(24) C(23)  H(26) 109.4 . . . no
 H(25) C(23)  H(26) 109.5 . . . no
 C(23) C(24)  H(27) 109.5 . . . no
 C(23) C(24)  H(28) 109.5 . . . no
 C(23) C(24)  H(29) 109.5 . . . no
 H(27) C(24)  H(28) 109.5 . . . no
 H(27) C(24)  H(29) 109.5 . . . no
 H(28) C(24)  H(29) 109.5 . . . no
#------------------------------------------------------------------------------
loop_
_geom_contact_atom_site_label_1
_geom_contact_atom_site_label_2
_geom_contact_distance
_geom_contact_site_symmetry_1
_geom_contact_site_symmetry_2
_geom_contact_publ_flag
 O(1)      C(13)     3.315(3)   . 3_666 no
 O(1)      C(16)     3.493(3)   . 5_545 no
 O(1)      C(14)     3.565(3)   . 3_666 no
 O(1)      C(20)     3.581(4)   . 1_545 no
 O(2)      C(13)     3.420(3)   . 3_666 no
 O(2)      C(2)      3.569(3)   . 3_666 no
 O(2)      O(2)      3.586(4)   . 3_666 no
 O(3)      C(21)     3.569(4)   . 1_545 no
 O(5)      C(10)     3.514(4)   . 6_656 no
 O(6)      C(23)     3.457(4)   . 2_656 no
 O(7)      C(21)     3.496(4)   . 1_545 no
 C(14)     C(16)     3.548(4)   . 7_566 no
 C(23)     C(23)     3.562(7)   . 2_656 no
#------------------------------------------------------------------------------
loop_
_geom_torsion_atom_site_label_1
_geom_torsion_atom_site_label_2
_geom_torsion_atom_site_label_3
_geom_torsion_atom_site_label_4
_geom_torsion_site_symmetry_1
_geom_torsion_site_symmetry_2
_geom_torsion_site_symmetry_3
_geom_torsion_site_symmetry_4
_geom_torsion
_geom_torsion_publ_flag
       ?  ?  ?  ?   ?   ? ? ? ?  ?
# -- ENTER TORSION ANGLES HERE, ONE PER LINE --
# e.g. C1 C2 C3 C4 52.8(1) . . . . yes
#------------------------------------------------------------------------------
